# Supplementary material for: RNA sequencing of db/db mice liver identifies lncRNA H19 as a key regulator of gluconeogenesis and hepatic glucose output
Source: PubMed Central journal article supplement (PMC5559625; doi:10.1038/s41598-017-08281-7), 2017-08-16

## Supplementary Data

### **RNA sequencing of db/db mice liver identifies lncRNA H19 as a key regulator of gluconeogenesis and hepatic glucose output**

Neha Goyal<sup>1,4</sup>, Ambily Sivadas<sup>1,3,4</sup>, Shamsudheen KV<sup>1,2,4</sup>, Rijith Jayarajan<sup>1,2</sup>, Ankit Verma<sup>1,2</sup>,  
Sridhar Sivasubbu<sup>1,2,4</sup>, Vinod Scaria<sup>1,3,4</sup> & Malabika Datta<sup>1,4</sup>

<sup>1</sup>CSIR-Institute of Genomics and Integrative Biology, Mall Road, Delhi 110007, India;

<sup>2</sup>Genomics and Molecular Medicine, CSIR-Institute of Genomics and Integrative Biology, Mathura Road, Delhi 110025, India;

<sup>3</sup>GN Ramachandran Knowledge Centre for Genome Informatics, CSIR-Institute of Genomics and Integrative Biology, Mathura Road, Delhi 110025, India;

<sup>4</sup>Academy of Scientific and Innovative Research, Training and Development Complex, CSIR Campus, CSIR Road, Taramani, Chennai, India.

Address Correspondence:

Dr. Malabika Datta  
CSIR-Institute of Genomics and Integrative Biology  
Mall Road, Delhi-110 007, India  
Ph.: +91 11 27667439, 27667602 Ext 135  
Fax: +91 11 27667471  
e-mail: [mdatta@igib.res.in](mailto:mdatta@igib.res.in)

**Supplementary Table S1 - RNA-Seq data summary and reference mapping.**

|                                                                          | <b>db/+</b>      |                | <b>db/db</b>   |              |
|--------------------------------------------------------------------------|------------------|----------------|----------------|--------------|
|                                                                          | <b>C1</b>        | <b>C2</b>      | <b>D1</b>      | <b>D2</b>    |
| <b>Raw reads ( x2 )</b>                                                  | 35.5M            | 34M            | 31.4M          | 42.8M        |
| <b>Post-QC ( x2 )</b>                                                    | 28.9M            | 26.8M          | 24.6M          | 33.8M        |
| <b>Aligned reads ( x2 )</b>                                              | 19.8M<br>(65.5%) | 17.4M<br>(62%) | 17.3M<br>(68%) | 24M<br>(69%) |
| <b>Expressed Genes [GENCODE (M3) Catalog - FPKM <math>\geq</math> 1]</b> | 10357            | 10443          | 10215          | 10292        |

**Supplementary Table S2 - FPKM values of 218 differentially expressed genes**

| gene_id                | gene      | locus                     | value_1 | value_2 | log2(fold_change) | p_value  | q_value | significant |
|------------------------|-----------|---------------------------|---------|---------|-------------------|----------|---------|-------------|
| ENSMUSG00000007122.6   | Casq1     | chr1:172209893-172219868  | 3.26148 | 0       | -100              | 5.00E-05 | 0.0047  | yes         |
| ENSMUSG00000007022.8   | Xirp2     | chr2:67446001-67526614    | 1.30011 | 0       | -100              | 5.00E-05 | 0.0047  | yes         |
| ENSMUSG00000003044.7   | Dhrs7c    | chr11:67798186-67816005   | 1.52324 | 0       | -100              | 5.00E-05 | 0.0047  | yes         |
| ENSMUSG000000053093.10 | Myh7      | chr14:54968677-54994634   | 5.65554 | 0       | -100              | 5.00E-05 | 0.0047  | yes         |
| ENSMUSG000000093861.1  | Igkv1-110 | chr6:68270526-68271267    | 1.72126 | 0       | -100              | 0.00015  | 0.01175 | yes         |
| ENSMUSG000000094164.1  | Ighv2-3   | chr12:113611183-113611617 | 1.06254 | 0       | -100              | 0.0007   | 0.0406  | yes         |
| ENSMUSG000000095335.1  | Igkv3-5   | chr6:70663297-70663895    | 1.26858 | 0       | -100              | 0.0002   | 0.01507 | yes         |
| ENSMUSG000000095351.1  | Igkv3-2   | chr6:70698467-70699067    | 1.56291 | 0       | -100              | 5.00E-05 | 0.0047  | yes         |
| ENSMUSG000000096422.1  | Igkv12-44 | chr6:69814630-69815100    | 1.31846 | 0       | -100              | 0.00025  | 0.01837 | yes         |
| ENSMUSG000000051747.9  | Ttn       | chr2:76703979-76982547    | 13.2952 | 0.02988 | -8.7973           | 5.00E-05 | 0.0047  | yes         |
| ENSMUSG000000021798.8  | Ldb3      | chr14:34526698-34588681   | 3.96291 | 0.01906 | -7.6999           | 0.00045  | 0.02942 | yes         |
| ENSMUS                 | Mup7      | chr4:600                  | 24.0521 | 0.63716 | -5.2384           | 0.0001   | 0.00851 | yes         |

|                               |               |                                       |         |         |         |          |         |     |
|-------------------------------|---------------|---------------------------------------|---------|---------|---------|----------|---------|-----|
| G0000007<br>3842.5            |               | 66468-<br>6007047<br>5                |         |         |         |          |         |     |
| ENSMUS<br>G0000002<br>0475.3  | Pgam2         | chr11:58<br>01639-<br>5803733         | 10.0409 | 0.38471 | -4.706  | 5.00E-05 | 0.0047  | yes |
| ENSMUS<br>G0000003<br>2648.9  | Pygm          | chr19:63<br>84398-<br>6398459         | 9.624   | 0.42103 | -4.5147 | 5.00E-05 | 0.0047  | yes |
| ENSMUS<br>G0000006<br>0600.10 | Eno3          | chr11:70<br>657201-<br>7066251<br>3   | 11.7899 | 0.51858 | -4.5069 | 5.00E-05 | 0.0047  | yes |
| ENSMUS<br>G0000003<br>0246.6  | Ldhb          | chr6:142<br>490248-<br>1425079<br>57  | 5.8243  | 0.28253 | -4.3656 | 0.0006   | 0.03678 | yes |
| ENSMUS<br>G0000006<br>8699.7  | Flnc          | chr6:294<br>33152-<br>2946188<br>8    | 2.21244 | 0.11179 | -4.3068 | 5.00E-05 | 0.0047  | yes |
| ENSMUS<br>G0000002<br>8464.11 | Tpm2          | chr4:435<br>14710-<br>4352376<br>5    | 31.7284 | 1.68771 | -4.2326 | 5.00E-05 | 0.0047  | yes |
| ENSMUS<br>G0000000<br>0031.10 | H19           | chr7:142<br>575528-<br>1425781<br>43  | 7.56898 | 0.41502 | -4.1889 | 5.00E-05 | 0.0047  | yes |
| ENSMUS<br>G0000007<br>6612.2  | Ighg2c        | chr12:11<br>3285324-<br>1132889<br>30 | 10.2257 | 0.62101 | -4.0414 | 5.00E-05 | 0.0047  | yes |
| ENSMUS<br>G0000002<br>6208.9  | Des           | chr1:753<br>60328-<br>7537501<br>2    | 13.1205 | 0.95265 | -3.7837 | 5.00E-05 | 0.0047  | yes |
| ENSMUS<br>G0000005<br>7722.12 | Lepr          | chr4:101<br>717403-<br>1018153<br>52  | 6.39182 | 0.51362 | -3.6375 | 5.00E-05 | 0.0047  | yes |
| ENSMUS<br>G0000006<br>4179.8  | Tnnt1         | chr7:450<br>4569-<br>4516382          | 7.42753 | 0.66772 | -3.4756 | 5.00E-05 | 0.0047  | yes |
| ENSMUS<br>G0000000<br>6221.7  | Hspb7         | chr4:141<br>420778-<br>1414253<br>11  | 1.61609 | 0.14597 | -3.4688 | 0.00045  | 0.02942 | yes |
| ENSMUS<br>G0000007            | Hsp25-<br>ps1 | chr13:45<br>078497-                   | 8.58126 | 0.7788  | -3.4619 | 0.00055  | 0.03425 | yes |

|                               |             |                                       |         |         |         |          |         |     |
|-------------------------------|-------------|---------------------------------------|---------|---------|---------|----------|---------|-----|
| 8915.1                        |             | 4508122<br>2                          |         |         |         |          |         |     |
| ENSMUS<br>G0000003<br>1791.7  | Tmem38<br>a | chr8:725<br>72102-<br>7258728<br>2    | 3.32143 | 0.30398 | -3.4498 | 0.00015  | 0.01175 | yes |
| ENSMUS<br>G0000002<br>9752.7  | Asns        | chr6:767<br>5168-<br>7693254          | 4.1332  | 0.38163 | -3.437  | 5.00E-05 | 0.0047  | yes |
| ENSMUS<br>G0000002<br>6950.11 | Neb         | chr2:521<br>36646-<br>5233879<br>8    | 13.3842 | 1.3092  | -3.3538 | 5.00E-05 | 0.0047  | yes |
| ENSMUS<br>G0000003<br>1633.4  | Slc25a4     | chr8:462<br>06796-<br>4621128<br>4    | 19.4112 | 1.96401 | -3.305  | 5.00E-05 | 0.0047  | yes |
| ENSMUS<br>G0000007<br>6614.2  | Ighg1       | chr12:11<br>3328975-<br>1133305<br>23 | 6.4415  | 0.66061 | -3.2855 | 0.00015  | 0.01175 | yes |
| ENSMUS<br>G0000007<br>6613.2  | Ighg2b      | chr12:11<br>3306388-<br>1133079<br>33 | 12.2121 | 1.28796 | -3.2452 | 5.00E-05 | 0.0047  | yes |
| ENSMUS<br>G0000005<br>3303.9  | Slc22a26    | chr19:77<br>81040-<br>7802667         | 28.2167 | 3.15445 | -3.1611 | 5.00E-05 | 0.0047  | yes |
| ENSMUS<br>G0000000<br>4951.10 | Hspb1       | chr5:135<br>887918-<br>1358895<br>63  | 4.56751 | 0.54447 | -3.0685 | 0.00035  | 0.02465 | yes |
| ENSMUS<br>G0000002<br>7796.2  | Smad9       | chr3:547<br>55581-<br>5480125<br>7    | 1.58131 | 0.18851 | -3.0684 | 5.00E-05 | 0.0047  | yes |
| ENSMUS<br>G0000002<br>7499.7  | Pkia        | chr3:736<br>6603-<br>7445366          | 1.18254 | 0.15031 | -2.9759 | 0.0006   | 0.03678 | yes |
| ENSMUS<br>G0000007<br>6609.1  | Igkc        | chr6:707<br>26434-<br>7072675<br>7    | 51.5235 | 6.90192 | -2.9002 | 5.00E-05 | 0.0047  | yes |
| ENSMUS<br>G0000003<br>2060.9  | Cryab       | chr9:507<br>52757-<br>5075663<br>3    | 7.74312 | 1.0729  | -2.8514 | 5.00E-05 | 0.0047  | yes |
| ENSMUS<br>G0000001<br>8566.9  | Slc2a4      | chr11:69<br>942538-<br>6994818        | 1.94366 | 0.27801 | -2.8056 | 0.00065  | 0.03884 | yes |

|                               |         |                                       |         |         |         |          |         |     |
|-------------------------------|---------|---------------------------------------|---------|---------|---------|----------|---------|-----|
|                               |         | 8                                     |         |         |         |          |         |     |
| ENSMUS<br>G0000006<br>7149.4  | Igj     | chr5:885<br>20511-<br>8852789<br>1    | 3.49652 | 0.50702 | -2.7858 | 0.0001   | 0.00851 | yes |
| ENSMUS<br>G0000002<br>7533.10 | Fabp5   | chr3:100<br>12547-<br>1001660<br>7    | 7.38389 | 1.07853 | -2.7753 | 5.00E-05 | 0.0047  | yes |
| ENSMUS<br>G0000002<br>3092.11 | Fhl1    | chrX:567<br>31786-<br>5679334<br>6    | 9.2289  | 1.38352 | -2.7378 | 5.00E-05 | 0.0047  | yes |
| ENSMUS<br>G0000009<br>5079.1  | Igha    | chr12:11<br>3258767-<br>1132602<br>36 | 10.8879 | 1.66857 | -2.706  | 5.00E-05 | 0.0047  | yes |
| ENSMUS<br>G0000007<br>4254.3  | Cyp2a4  | chr7:263<br>07189-<br>2631508<br>8    | 80.2433 | 12.555  | -2.6761 | 5.00E-05 | 0.0047  | yes |
| ENSMUS<br>G0000007<br>4280.5  | Gm6166  | chr9:574<br>83912-<br>5748458<br>5    | 9.31749 | 1.48589 | -2.6486 | 0.00015  | 0.01175 | yes |
| ENSMUS<br>G0000007<br>3834.5  | Mup11   | chr4:606<br>58465-<br>6066241<br>1    | 80.4653 | 13.0867 | -2.6203 | 5.00E-05 | 0.0047  | yes |
| ENSMUS<br>G0000002<br>9417.8  | Cxcl9   | chr5:923<br>21330-<br>9232807<br>9    | 6.1194  | 1.07663 | -2.5069 | 5.00E-05 | 0.0047  | yes |
| ENSMUS<br>G0000000<br>0628.5  | Hk2     | chr6:827<br>25024-<br>8277445<br>4    | 2.13531 | 0.45014 | -2.246  | 5.00E-05 | 0.0047  | yes |
| ENSMUS<br>G0000003<br>2366.10 | Tpm1    | chr9:670<br>22589-<br>6704940<br>6    | 39.7432 | 9.0572  | -2.1336 | 5.00E-05 | 0.0047  | yes |
| ENSMUS<br>G0000009<br>0877.3  | Hspa1b  | chr17:34<br>956435-<br>3495923<br>8   | 5.8126  | 1.3632  | -2.0922 | 5.00E-05 | 0.0047  | yes |
| ENSMUS<br>G0000005<br>0440.7  | Hamp    | chr7:309<br>42370-<br>3094401<br>7    | 356.133 | 92.4839 | -1.9451 | 5.00E-05 | 0.0047  | yes |
| ENSMUS                        | Cyp2c40 | chr19:39                              | 27.3123 | 7.36805 | -1.8902 | 0.00055  | 0.03425 | yes |

|                               |               |                                       |         |         |         |          |         |     |
|-------------------------------|---------------|---------------------------------------|---------|---------|---------|----------|---------|-----|
| G0000002<br>5004.10           |               | 767070-<br>3981281<br>4               |         |         |         |          |         |     |
| ENSMUS<br>G0000002<br>4962.8  | Vegfb         | chr19:69<br>82472-<br>6987651         | 6.20312 | 1.7005  | -1.867  | 0.0001   | 0.00851 | yes |
| ENSMUS<br>G0000004<br>0026.7  | Saa3          | chr7:467<br>11997-<br>4671567<br>6    | 21.0316 | 5.83095 | -1.8508 | 5.00E-05 | 0.0047  | yes |
| ENSMUS<br>G0000001<br>5568.10 | Lpl           | chr8:688<br>80490-<br>6890744<br>8    | 9.96153 | 2.81926 | -1.8211 | 5.00E-05 | 0.0047  | yes |
| ENSMUS<br>G0000007<br>2849.5  | Serpina1<br>e | chr12:10<br>3946930-<br>1039589<br>75 | 463.248 | 133.432 | -1.7957 | 0.00065  | 0.03884 | yes |
| ENSMUS<br>G0000003<br>6854.9  | Hspb6         | chr7:305<br>39133-<br>3055983<br>8    | 7.99937 | 2.37815 | -1.7501 | 0.0009   | 0.04797 | yes |
| ENSMUS<br>G0000009<br>2274.2  | Neat1         | chr19:58<br>24707-<br>5845478         | 8.72721 | 2.7236  | -1.68   | 5.00E-05 | 0.0047  | yes |
| ENSMUS<br>G0000004<br>2834.9  | Nrep          | chr18:33<br>437018-<br>3346402<br>9   | 4.85936 | 1.53699 | -1.6607 | 0.0002   | 0.01507 | yes |
| ENSMUS<br>G0000003<br>9519.6  | Cyp7b1        | chr3:180<br>71949-<br>1824333<br>8    | 17.023  | 5.43518 | -1.6471 | 0.0002   | 0.01507 | yes |
| ENSMUS<br>G0000009<br>2008.1  | Cyp2c69       | chr19:39<br>842659-<br>3988676<br>9   | 4.83307 | 1.54436 | -1.6459 | 0.0003   | 0.02164 | yes |
| ENSMUS<br>G0000003<br>9323.13 | Igfbp2        | chr1:728<br>24502-<br>7285247<br>4    | 189.748 | 60.638  | -1.6458 | 5.00E-05 | 0.0047  | yes |
| ENSMUS<br>G0000005<br>6978.6  | Hamp2         | chr7:309<br>22371-<br>3092418<br>1    | 79.7169 | 25.6126 | -1.638  | 5.00E-05 | 0.0047  | yes |
| ENSMUS<br>G0000002<br>2218.10 | Tgml          | chr14:55<br>700008-<br>5571349<br>2   | 5.63318 | 1.91252 | -1.5585 | 5.00E-05 | 0.0047  | yes |
| ENSMUS                        | Ar            | chrX:981                              | 1.45873 | 0.51708 | -1.4962 | 0.0001   | 0.00851 | yes |

|                               |                  |                                       |         |         |         |          |         |     |
|-------------------------------|------------------|---------------------------------------|---------|---------|---------|----------|---------|-----|
| G0000004<br>6532.7            |                  | 49720-<br>9832321<br>5                |         |         |         |          |         |     |
| ENSMUS<br>G0000003<br>6594.9  | H2-Aa            | chr17:34<br>282743-<br>3428782<br>7   | 12.0925 | 4.45341 | -1.4411 | 0.0003   | 0.02164 | yes |
| ENSMUS<br>G0000003<br>2898.6  | Fbxo21           | chr5:117<br>976769-<br>1180101<br>91  | 15.1085 | 5.59704 | -1.4326 | 5.00E-05 | 0.0047  | yes |
| ENSMUS<br>G0000002<br>2181.10 | C6               | chr15:47<br>27174-<br>4815456         | 20.4765 | 7.6384  | -1.4226 | 0.00085  | 0.04571 | yes |
| ENSMUS<br>G0000002<br>5197.8  | Cyp2c44          | chr19:44<br>005021-<br>4402924<br>7   | 84.4544 | 31.7178 | -1.4129 | 5.00E-05 | 0.0047  | yes |
| ENSMUS<br>G0000001<br>9838.10 | Slc16a10         | chr10:40<br>033534-<br>4014225<br>4   | 20.981  | 8.06433 | -1.3795 | 5.00E-05 | 0.0047  | yes |
| ENSMUS<br>G0000003<br>7266.13 | Rsrp1            | chr4:134<br>923591-<br>1349276<br>71  | 24.5877 | 9.49961 | -1.372  | 5.00E-05 | 0.0047  | yes |
| ENSMUS<br>G0000003<br>3065.8  | Pfkm             | chr15:98<br>038743-<br>9813244<br>7   | 10.5786 | 4.18554 | -1.3377 | 0.00045  | 0.02942 | yes |
| ENSMUS<br>G0000006<br>0807.7  | Serpina6         | chr12:10<br>3646629-<br>1036572<br>12 | 151.363 | 60.4092 | -1.3252 | 5.00E-05 | 0.0047  | yes |
| ENSMUS<br>G0000002<br>4610.9  | Cd74             | chr18:60<br>803847-<br>6081264<br>6   | 59.5103 | 24.2748 | -1.2937 | 5.00E-05 | 0.0047  | yes |
| ENSMUS<br>G0000010<br>0094.1  | RP23-<br>181K4.2 | chr7:658<br>03110-<br>6580644<br>9    | 48.0523 | 20.1054 | -1.257  | 0.0001   | 0.00851 | yes |
| ENSMUS<br>G0000000<br>8035.7  | Midlip1          | chrX:107<br>07175-<br>1071969<br>0    | 43.698  | 18.4455 | -1.2443 | 0.0008   | 0.04444 | yes |
| ENSMUS<br>G0000007<br>3421.5  | H2-Ab1           | chr17:34<br>263208-<br>3426941<br>8   | 10.1955 | 4.31018 | -1.2421 | 0.0007   | 0.0406  | yes |



|                               |          |                                       |         |         |         |         |         |     |
|-------------------------------|----------|---------------------------------------|---------|---------|---------|---------|---------|-----|
| ENSMUS<br>G0000003<br>1441.10 | Atp11a   | chr8:127<br>57013-<br>1302090<br>5    | 7.27474 | 3.09555 | -1.2327 | 0.00095 | 0.04952 | yes |
| ENSMUS<br>G0000003<br>9218.11 | Srrm2    | chr17:23<br>790531-<br>2382910<br>9   | 15.7919 | 6.85716 | -1.2035 | 0.00085 | 0.04571 | yes |
| ENSMUS<br>G0000004<br>1698.6  | Slco1a1  | chr6:141<br>907281-<br>1419469<br>62  | 25.6429 | 11.4024 | -1.1692 | 0.0002  | 0.01507 | yes |
| ENSMUS<br>G0000000<br>0303.7  | Cdh1     | chr8:106<br>603350-<br>1066702<br>46  | 4.81223 | 2.16504 | -1.1523 | 0.00035 | 0.02465 | yes |
| ENSMUS<br>G0000003<br>8872.9  | Zfx3     | chr8:108<br>703099-<br>1089616<br>30  | 1.65049 | 0.75542 | -1.1275 | 0.00075 | 0.04266 | yes |
| ENSMUS<br>G0000001<br>1148.8  | Adss1    | chr12:11<br>2620044-<br>1126413<br>54 | 10.1818 | 4.70572 | -1.1135 | 0.00065 | 0.03884 | yes |
| ENSMUS<br>G0000005<br>2837.5  | Junb     | chr8:849<br>76908-<br>8497874<br>8    | 10.9806 | 5.19914 | -1.0786 | 0.00075 | 0.04266 | yes |
| ENSMUS<br>G0000002<br>5132.8  | Arhgdia  | chr11:12<br>0578103-<br>1205816<br>24 | 21.5495 | 11.16   | -0.9493 | 0.00085 | 0.04571 | yes |
| ENSMUS<br>G0000002<br>0307.9  | Cdc34    | chr10:79<br>682194-<br>7968839<br>4   | 18.6089 | 36.0997 | 0.95599 | 0.00085 | 0.04571 | yes |
| ENSMUS<br>G0000000<br>9646.8  | Pla2g12b | chr10:59<br>403659-<br>5942197<br>6   | 16.5746 | 32.3678 | 0.96559 | 0.00095 | 0.04952 | yes |
| ENSMUS<br>G0000003<br>8150.7  | Ormdl3   | chr11:98<br>581255-<br>9858736<br>8   | 13.9366 | 27.6454 | 0.98816 | 0.0007  | 0.0406  | yes |
| ENSMUS<br>G0000003<br>8403.9  | Hfe2     | chr3:965<br>25184-<br>9652921<br>6    | 10.4075 | 20.7492 | 0.99543 | 0.00065 | 0.03884 | yes |
| ENSMUS<br>G0000002            | Rtfdc1   | chr2:172<br>393793-                   | 9.31587 | 19.0373 | 1.03107 | 0.00095 | 0.04952 | yes |

|                               |              |                                      |         |         |         |         |         |     |
|-------------------------------|--------------|--------------------------------------|---------|---------|---------|---------|---------|-----|
| 7502.6                        |              | 1724699<br>08                        |         |         |         |         |         |     |
| ENSMUS<br>G0000003<br>6752.4  | Tubb4b       | chr2:252<br>18744-<br>2522470<br>2   | 17.0668 | 35.1857 | 1.0438  | 0.00015 | 0.01175 | yes |
| ENSMUS<br>G0000004<br>0562.7  | Gstm2        | chr3:107<br>981701-<br>1079864<br>53 | 10.7256 | 22.1266 | 1.04473 | 0.00055 | 0.03425 | yes |
| ENSMUS<br>G0000005<br>0777.7  | Tmem37       | chr1:120<br>067376-<br>1200740<br>74 | 18.9585 | 40.5323 | 1.09623 | 0.00015 | 0.01175 | yes |
| ENSMUS<br>G0000002<br>2742.5  | Cpox         | chr16:58<br>670207-<br>5868039<br>1  | 23.0178 | 49.4976 | 1.10461 | 0.0007  | 0.0406  | yes |
| ENSMUS<br>G0000002<br>7222.9  | Pex16        | chr2:923<br>65045-<br>9238121<br>7   | 21.6163 | 46.8077 | 1.11462 | 0.00055 | 0.03425 | yes |
| ENSMUS<br>G0000002<br>8383.12 | Hsd12        | chr4:595<br>81562-<br>5961868<br>9   | 12.2322 | 26.4919 | 1.11487 | 0.00055 | 0.03425 | yes |
| ENSMUS<br>G0000001<br>8585.9  | Atox1        | chr11:55<br>446640-<br>5546123<br>9  | 41.3268 | 89.5367 | 1.1154  | 0.00015 | 0.01175 | yes |
| ENSMUS<br>G0000000<br>2289.10 | Angptl4      | chr17:33<br>773749-<br>3378157<br>5  | 24.9229 | 54.4419 | 1.12725 | 0.00045 | 0.02942 | yes |
| ENSMUS<br>G0000003<br>2350.8  | Gclc         | chr9:777<br>54534-<br>7779448<br>5   | 24.483  | 55.1182 | 1.17075 | 0.0004  | 0.02704 | yes |
| ENSMUS<br>G0000003<br>9886.3  | Tmem12<br>0a | chr5:135<br>735484-<br>1357442<br>71 | 17.4149 | 39.5456 | 1.1832  | 0.0001  | 0.00851 | yes |
| ENSMUS<br>G0000001<br>5337.5  | Endog        | chr2:301<br>71492-<br>3017845<br>9   | 15.5334 | 35.3518 | 1.18641 | 0.0009  | 0.04797 | yes |
| ENSMUS<br>G0000002<br>0142.7  | Slc1a4       | chr11:20<br>302179-<br>2033271<br>3  | 1.16807 | 2.68144 | 1.19888 | 0.00095 | 0.04952 | yes |

|                               |               |                                       |         |         |         |          |         |     |
|-------------------------------|---------------|---------------------------------------|---------|---------|---------|----------|---------|-----|
| ENSMUS<br>G0000002<br>5260.5  | Hsd17b1<br>0  | chrX:152<br>001844-<br>1520044<br>42  | 57.7084 | 133.363 | 1.20851 | 0.0001   | 0.00851 | yes |
| ENSMUS<br>G0000002<br>4827.9  | Gldc          | chr19:30<br>098448-<br>3017541<br>8   | 23.1202 | 53.8621 | 1.22012 | 0.0004   | 0.02704 | yes |
| ENSMUS<br>G0000004<br>4469.7  | Tnfaip8l<br>1 | chr17:56<br>162476-<br>5617395<br>5   | 2.49143 | 5.85408 | 1.23247 | 0.00015  | 0.01175 | yes |
| ENSMUS<br>G0000002<br>5059.11 | Gyk           | chrX:857<br>01936-<br>8577681<br>9    | 9.50386 | 22.3524 | 1.23384 | 0.0001   | 0.00851 | yes |
| ENSMUS<br>G0000004<br>7492.4  | Inhbe         | chr10:12<br>7349401-<br>1273517<br>72 | 8.09466 | 19.0552 | 1.23514 | 5.00E-05 | 0.0047  | yes |
| ENSMUS<br>G0000002<br>4747.3  | Aldh1a7       | chr19:20<br>692952-<br>2072756<br>2   | 42.6169 | 100.641 | 1.23971 | 0.00015  | 0.01175 | yes |
| ENSMUS<br>G0000001<br>5357.5  | Clpx          | chr9:652<br>94259-<br>6533065<br>8    | 10.5995 | 25.0619 | 1.2415  | 0.0001   | 0.00851 | yes |
| ENSMUS<br>G0000003<br>8181.11 | Chpf2         | chr5:245<br>86740-<br>2460201<br>2    | 3.34433 | 7.91633 | 1.24311 | 0.00015  | 0.01175 | yes |
| ENSMUS<br>G0000002<br>2790.8  | Igsf11        | chr16:38<br>901470-<br>3902715<br>9   | 5.00998 | 11.8612 | 1.24338 | 0.00055  | 0.03425 | yes |
| ENSMUS<br>G0000003<br>6181.2  | Hist1h1c      | chr13:23<br>738807-<br>2374036<br>7   | 19.7177 | 46.6827 | 1.24339 | 5.00E-05 | 0.0047  | yes |
| ENSMUS<br>G0000003<br>9956.3  | Mrap          | chr16:90<br>738323-<br>9074978<br>5   | 12.4748 | 29.6024 | 1.2467  | 0.00015  | 0.01175 | yes |
| ENSMUS<br>G0000002<br>6614.6  | Slc30a10      | chr1:185<br>447115-<br>1854687<br>62  | 1.64241 | 3.90073 | 1.24793 | 5.00E-05 | 0.0047  | yes |
| ENSMUS<br>G0000000            | Epha2         | chr4:141<br>301239-                   | 1.94415 | 4.65885 | 1.26084 | 0.0005   | 0.03233 | yes |

|                               |          |                                       |         |         |         |          |         |     |
|-------------------------------|----------|---------------------------------------|---------|---------|---------|----------|---------|-----|
| 6445.3                        |          | 1413293<br>84                         |         |         |         |          |         |     |
| ENSMUS<br>G0000002<br>1336.11 | Slc17a4  | chr13:23<br>897737-<br>2391500<br>7   | 5.62269 | 13.4836 | 1.26188 | 5.00E-05 | 0.0047  | yes |
| ENSMUS<br>G0000002<br>9162.10 | Khk      | chr5:309<br>21555-<br>3093124<br>6    | 123.176 | 296.296 | 1.26632 | 0.0007   | 0.0406  | yes |
| ENSMUS<br>G0000003<br>2602.5  | Slc25a20 | chr9:108<br>662097-<br>1086846<br>41  | 28.7479 | 69.2966 | 1.26933 | 5.00E-05 | 0.0047  | yes |
| ENSMUS<br>G0000007<br>8650.2  | G6pc     | chr11:10<br>1367560-<br>1013779<br>03 | 65.2522 | 157.482 | 1.27109 | 0.00095  | 0.04952 | yes |
| ENSMUS<br>G0000004<br>1845.5  | Rhod     | chr19:44<br>25458-<br>4477447         | 5.6321  | 13.7653 | 1.28929 | 0.00025  | 0.01837 | yes |
| ENSMUS<br>G0000003<br>8539.9  | Atf5     | chr7:448<br>12256-<br>4484080<br>9    | 32.7127 | 80.1186 | 1.29229 | 0.0002   | 0.01507 | yes |
| ENSMUS<br>G0000004<br>2632.11 | Pla2g6   | chr15:79<br>286227-<br>7932839<br>0   | 13.6229 | 33.5476 | 1.30017 | 0.00025  | 0.01837 | yes |
| ENSMUS<br>G0000004<br>2476.8  | Abcb4    | chr5:889<br>3720-<br>8959225          | 28.3657 | 70.5111 | 1.3137  | 5.00E-05 | 0.0047  | yes |
| ENSMUS<br>G0000003<br>6781.8  | Rps27l   | chr9:669<br>46085-<br>6694951<br>6    | 62.4468 | 155.978 | 1.32064 | 5.00E-05 | 0.0047  | yes |
| ENSMUS<br>G0000002<br>1751.8  | Acox2    | chr14:82<br>25510-<br>8259353         | 50.6442 | 127.465 | 1.33163 | 0.0004   | 0.02704 | yes |
| ENSMUS<br>G0000003<br>1762.6  | Mt2      | chr8:941<br>72617-<br>9417356<br>7    | 127.023 | 322.023 | 1.34207 | 0.0007   | 0.0406  | yes |
| ENSMUS<br>G0000004<br>7446.13 | Arl4a    | chr12:40<br>005446-<br>4003802<br>5   | 3.70304 | 9.51991 | 1.36224 | 0.0005   | 0.03233 | yes |
| ENSMUS<br>G0000003<br>7583.2  | Nr0b2    | chr4:133<br>553375-<br>1335565        | 6.94196 | 17.9273 | 1.36874 | 5.00E-05 | 0.0047  | yes |

|                               |                   |                                      |         |         |         |          |         |     |
|-------------------------------|-------------------|--------------------------------------|---------|---------|---------|----------|---------|-----|
|                               |                   | 36                                   |         |         |         |          |         |     |
| ENSMUS<br>G0000000<br>9633.2  | G0s2              | chr1:193<br>272160-<br>1932731<br>88 | 43.4076 | 112.309 | 1.37146 | 5.00E-05 | 0.0047  | yes |
| ENSMUS<br>G0000006<br>7279.2  | Ppp1r3c           | chr19:36<br>731736-<br>3673665<br>3  | 6.34858 | 16.4941 | 1.37744 | 5.00E-05 | 0.0047  | yes |
| ENSMUS<br>G0000006<br>3558.4  | Aox1              | chr1:580<br>29930-<br>5810641<br>3   | 7.2043  | 18.8961 | 1.39116 | 5.00E-05 | 0.0047  | yes |
| ENSMUS<br>G0000002<br>9630.10 | Cyp3a25           | chr5:145<br>977193-<br>1460096<br>18 | 84.2196 | 221.629 | 1.39592 | 0.0001   | 0.00851 | yes |
| ENSMUS<br>G0000005<br>6313.5  | 1810011<br>O10Rik | chr8:244<br>22403-<br>2444000<br>8   | 5.49141 | 14.4559 | 1.39641 | 5.00E-05 | 0.0047  | yes |
| ENSMUS<br>G0000006<br>0002.9  | Chpt1             | chr10:88<br>452744-<br>8850407<br>3  | 25.9204 | 68.2863 | 1.39751 | 5.00E-05 | 0.0047  | yes |
| ENSMUS<br>G0000002<br>3019.7  | Gpd1              | chr15:99<br>715542-<br>9972500<br>5  | 44.5475 | 118.698 | 1.41387 | 5.00E-05 | 0.0047  | yes |
| ENSMUS<br>G0000002<br>4778.7  | Fas               | chr19:34<br>290658-<br>3432777<br>0  | 3.94372 | 10.5494 | 1.41953 | 0.0008   | 0.04444 | yes |
| ENSMUS<br>G0000001<br>0755.11 | Cars              | chr7:143<br>557229-<br>1436000<br>90 | 5.02322 | 13.512  | 1.42755 | 5.00E-05 | 0.0047  | yes |
| ENSMUS<br>G0000003<br>4220.7  | Gpc1              | chr1:928<br>20957-<br>9286077<br>9   | 2.41414 | 6.58427 | 1.44751 | 5.00E-05 | 0.0047  | yes |
| ENSMUS<br>G0000006<br>7144.6  | Slc22a7           | chr17:46<br>432184-<br>4643847<br>7  | 8.22372 | 22.5326 | 1.45415 | 5.00E-05 | 0.0047  | yes |
| ENSMUS<br>G0000002<br>6890.14 | Lhx6              | chr2:360<br>81952-<br>3610540<br>8   | 0.61975 | 1.707   | 1.4617  | 0.00085  | 0.04571 | yes |
| ENSMUS                        | Dmgdh             | chr13:93                             | 70.1197 | 194.31  | 1.47047 | 0.0003   | 0.02164 | yes |

|                              |          |                                      |         |         |         |          |         |     |
|------------------------------|----------|--------------------------------------|---------|---------|---------|----------|---------|-----|
| G0000004<br>2102.6           |          | 674432-<br>9375283<br>1              |         |         |         |          |         |     |
| ENSMUS<br>G0000002<br>8766.5 | Alpl     | chr4:137<br>741732-<br>1377963<br>84 | 6.31384 | 17.5613 | 1.47581 | 0.0002   | 0.01507 | yes |
| ENSMUS<br>G0000003<br>1775.4 | Plp      | chr8:946<br>74894-<br>9469624<br>2   | 1.87823 | 5.26222 | 1.4863  | 0.00025  | 0.01837 | yes |
| ENSMUS<br>G0000003<br>7440.7 | Vnn1     | chr10:23<br>894687-<br>2390534<br>3  | 9.69456 | 27.2706 | 1.4921  | 5.00E-05 | 0.0047  | yes |
| ENSMUS<br>G0000004<br>1653.4 | Pnpla3   | chr15:84<br>167815-<br>8418951<br>2  | 0.73123 | 2.06049 | 1.49458 | 0.00045  | 0.02942 | yes |
| ENSMUS<br>G0000007<br>2664.5 | Ugt3a1   | chr15:92<br>73318-<br>9315032        | 11.7818 | 33.2059 | 1.49488 | 0.0008   | 0.04444 | yes |
| ENSMUS<br>G0000005<br>2565.6 | Hist1h1d | chr13:23<br>555086-<br>2355583<br>0  | 4.99362 | 14.1914 | 1.50685 | 0.0004   | 0.02704 | yes |
| ENSMUS<br>G0000003<br>0545.8 | Pex11a   | chr7:797<br>35956-<br>7974313<br>1   | 8.64952 | 24.8737 | 1.52393 | 5.00E-05 | 0.0047  | yes |
| ENSMUS<br>G0000003<br>6957.7 | Lrfn3    | chr7:303<br>55513-<br>3036277<br>2   | 0.8538  | 2.49728 | 1.54839 | 0.00035  | 0.02465 | yes |
| ENSMUS<br>G0000003<br>0762.6 | Aqp8     | chr7:123<br>462293-<br>1234680<br>03 | 9.52634 | 27.9933 | 1.55509 | 5.00E-05 | 0.0047  | yes |
| ENSMUS<br>G0000002<br>0108.3 | Ddit4    | chr10:59<br>949674-<br>5995177<br>0  | 3.19017 | 9.38872 | 1.5573  | 5.00E-05 | 0.0047  | yes |
| ENSMUS<br>G0000002<br>8655.6 | Mfsd2a   | chr4:122<br>946849-<br>1229611<br>88 | 27.9293 | 82.5885 | 1.56416 | 5.00E-05 | 0.0047  | yes |
| ENSMUS<br>G0000001<br>6028.9 | Celsr1   | chr15:85<br>898757-<br>8603377<br>7  | 0.66031 | 1.96241 | 1.5714  | 5.00E-05 | 0.0047  | yes |

|                               |                   |                                       |         |         |         |          |         |     |
|-------------------------------|-------------------|---------------------------------------|---------|---------|---------|----------|---------|-----|
| ENSMUS<br>G0000003<br>5372.1  | 1810055<br>G02Rik | chr19:37<br>08332-<br>3717881         | 10.512  | 31.3618 | 1.57698 | 5.00E-05 | 0.0047  | yes |
| ENSMUS<br>G0000002<br>2010.14 | Tsc22d1           | chr14:76<br>414960-<br>7650776<br>5   | 8.89844 | 26.736  | 1.58716 | 5.00E-05 | 0.0047  | yes |
| ENSMUS<br>G0000001<br>1305.6  | Plin5             | chr17:56<br>111600-<br>5611759<br>6   | 8.89591 | 26.978  | 1.60057 | 5.00E-05 | 0.0047  | yes |
| ENSMUS<br>G0000006<br>0519.6  | Tor3a             | chr1:156<br>653616-<br>1566743<br>56  | 1.30593 | 4.06697 | 1.63887 | 0.00075  | 0.04266 | yes |
| ENSMUS<br>G0000003<br>6216.5  | Leap2             | chr11:53<br>422180-<br>5342317<br>0   | 53.0052 | 165.874 | 1.64589 | 5.00E-05 | 0.0047  | yes |
| ENSMUS<br>G0000004<br>8856.8  | Slc25a47          | chr12:10<br>8851128-<br>1088568<br>14 | 139.028 | 435.486 | 1.64725 | 0.0001   | 0.00851 | yes |
| ENSMUS<br>G0000002<br>9269.6  | Sult1b1           | chr5:875<br>13338-<br>8753819<br>5    | 5.31234 | 16.735  | 1.65545 | 5.00E-05 | 0.0047  | yes |
| ENSMUS<br>G0000002<br>8715.2  | Cyp4a14           | chr4:115<br>486199-<br>1154961<br>42  | 120.639 | 380.482 | 1.65713 | 0.0004   | 0.02704 | yes |
| ENSMUS<br>G0000002<br>0326.7  | Ccng1             | chr11:40<br>748551-<br>4075531<br>1   | 5.52366 | 17.4392 | 1.65864 | 5.00E-05 | 0.0047  | yes |
| ENSMUS<br>G0000003<br>0609.13 | Aen               | chr7:788<br>95853-<br>7891120<br>9    | 2.17754 | 7.02138 | 1.68906 | 5.00E-05 | 0.0047  | yes |
| ENSMUS<br>G0000002<br>3057.5  | Fabp2             | chr3:122<br>864736-<br>1229241<br>16  | 8.60366 | 27.9748 | 1.7011  | 5.00E-05 | 0.0047  | yes |
| ENSMUS<br>G0000007<br>4264.7  | Amy1              | chr3:113<br>555709-<br>1136301<br>49  | 36.0277 | 118.48  | 1.71746 | 5.00E-05 | 0.0047  | yes |
| ENSMUS<br>G0000002<br>6853.10 | Crat              | chr2:303<br>92253-<br>3041581         | 8.69708 | 28.6125 | 1.71804 | 5.00E-05 | 0.0047  | yes |

|                               |          |                                      |         |         |         |          |         |     |
|-------------------------------|----------|--------------------------------------|---------|---------|---------|----------|---------|-----|
|                               |          | 3                                    |         |         |         |          |         |     |
| ENSMUS<br>G0000002<br>8494.7  | Plin2    | chr4:866<br>48385-<br>8667006<br>0   | 76.2897 | 252.323 | 1.72571 | 5.00E-05 | 0.0047  | yes |
| ENSMUS<br>G0000002<br>0423.6  | Btg2     | chr1:134<br>075169-<br>1340791<br>20 | 1.60436 | 5.44606 | 1.76322 | 5.00E-05 | 0.0047  | yes |
| ENSMUS<br>G0000004<br>2429.8  | Adora1   | chr1:134<br>193447-<br>1342354<br>31 | 1.57885 | 5.40014 | 1.77413 | 5.00E-05 | 0.0047  | yes |
| ENSMUS<br>G0000009<br>1867.1  | Cyp2a22  | chr7:269<br>31630-<br>2693938<br>6   | 7.87446 | 26.9767 | 1.77646 | 5.00E-05 | 0.0047  | yes |
| ENSMUS<br>G0000002<br>8893.8  | Sesn2    | chr4:132<br>492031-<br>1325105<br>01 | 1.06661 | 3.79133 | 1.82967 | 5.00E-05 | 0.0047  | yes |
| ENSMUS<br>G0000000<br>3555.7  | Cyp17a1  | chr19:46<br>667164-<br>4667297<br>4  | 25.5367 | 90.8675 | 1.83119 | 5.00E-05 | 0.0047  | yes |
| ENSMUS<br>G0000002<br>2883.10 | Robo1    | chr16:72<br>663148-<br>7304609<br>5  | 0.71879 | 2.64975 | 1.88222 | 5.00E-05 | 0.0047  | yes |
| ENSMUS<br>G0000002<br>9763.12 | Exoc4    | chr6:332<br>49084-<br>3397397<br>9   | 4.49249 | 17.1033 | 1.92869 | 5.00E-05 | 0.0047  | yes |
| ENSMUS<br>G0000003<br>2418.10 | Me1      | chr9:865<br>81370-<br>8670125<br>3   | 5.41139 | 20.7037 | 1.93582 | 5.00E-05 | 0.0047  | yes |
| ENSMUS<br>G0000004<br>1959.9  | S100a10  | chr3:935<br>55079-<br>9356464<br>3   | 27.1462 | 104.407 | 1.9434  | 5.00E-05 | 0.0047  | yes |
| ENSMUS<br>G0000002<br>3828.2  | Slc22a3  | chr17:12<br>419971-<br>1250770<br>4  | 0.59503 | 2.33171 | 1.97035 | 5.00E-05 | 0.0047  | yes |
| ENSMUS<br>G0000002<br>1226.7  | Acot2    | chr12:83<br>987860-<br>8399387<br>3  | 1.34747 | 5.286   | 1.97193 | 5.00E-05 | 0.0047  | yes |
| ENSMUS                        | Hist1h4n | chr13:21                             | 3.30177 | 13.6194 | 2.04435 | 0.00045  | 0.02942 | yes |



|                               |                   |                                       |         |         |         |          |         |     |
|-------------------------------|-------------------|---------------------------------------|---------|---------|---------|----------|---------|-----|
| G0000006<br>9305.3            |                   | 831766-<br>2183219<br>6               |         |         |         |          |         |     |
| ENSMUS<br>G0000006<br>8083.1  | Cyp2d40           | chr15:82<br>759834-<br>8276418<br>3   | 27.3873 | 113.33  | 2.04895 | 5.00E-05 | 0.0047  | yes |
| ENSMUS<br>G0000005<br>1579.5  | Tceal8            | chrX:136<br>168983-<br>1361723<br>42  | 4.74987 | 19.7275 | 2.05425 | 5.00E-05 | 0.0047  | yes |
| ENSMUS<br>G0000004<br>2041.6  | 2010003<br>K11Rik | chr19:44<br>96789-<br>4498583         | 4.72342 | 19.6457 | 2.05631 | 5.00E-05 | 0.0047  | yes |
| ENSMUS<br>G0000002<br>0604.8  | Arsg              | chr11:10<br>9425945-<br>1095733<br>30 | 1.87664 | 7.88634 | 2.0712  | 0.0004   | 0.02704 | yes |
| ENSMUS<br>G0000004<br>1567.3  | Serpina1<br>2     | chr12:10<br>4028768-<br>1040444<br>43 | 0.29203 | 1.2467  | 2.09392 | 0.00075  | 0.04266 | yes |
| ENSMUS<br>G0000002<br>5003.6  | Cyp2c39           | chr19:39<br>510861-<br>3956852<br>9   | 1.16725 | 5.03282 | 2.10825 | 5.00E-05 | 0.0047  | yes |
| ENSMUS<br>G0000009<br>6105.1  | Bhmt-<br>ps1      | chr4:263<br>68983-<br>2637020<br>7    | 5.1931  | 22.5453 | 2.11816 | 5.00E-05 | 0.0047  | yes |
| ENSMUS<br>G0000004<br>5776.2  | Lrtm1             | chr14:28<br>904942-<br>2972186<br>4   | 0.70904 | 3.27268 | 2.20653 | 5.00E-05 | 0.0047  | yes |
| ENSMUS<br>G0000002<br>3073.1  | Slc10a2           | chr8:508<br>5622-<br>5105232          | 0.98894 | 4.58736 | 2.21371 | 5.00E-05 | 0.0047  | yes |
| ENSMUS<br>G0000003<br>8754.4  | Elov13            | chr19:46<br>131896-<br>4613530<br>7   | 1.59146 | 7.74356 | 2.28265 | 5.00E-05 | 0.0047  | yes |
| ENSMUS<br>G0000000<br>2944.10 | Cd36              | chr5:177<br>81689-<br>1788895<br>9    | 11.6802 | 57.3461 | 2.29563 | 5.00E-05 | 0.0047  | yes |
| ENSMUS<br>G0000000<br>3721.9  | Insig2            | chr1:121<br>304352-<br>1213325<br>89  | 21.4696 | 110.427 | 2.36273 | 5.00E-05 | 0.0047  | yes |
| ENSMUS                        | Tubb2a            | chr13:34                              | 4.16672 | 21.9011 | 2.39402 | 5.00E-05 | 0.0047  | yes |

|                              |         |                                      |         |         |         |          |         |     |
|------------------------------|---------|--------------------------------------|---------|---------|---------|----------|---------|-----|
| G0000005<br>8672.6           |         | 074300-<br>3407800<br>8              |         |         |         |          |         |     |
| ENSMUS<br>G0000007<br>9494.1 | Cml5    | chr6:858<br>08023-<br>8582097<br>2   | 1.81887 | 9.72126 | 2.4181  | 0.0001   | 0.00851 | yes |
| ENSMUS<br>G0000003<br>1886.8 | Ces2e   | chr8:104<br>926259-<br>1049346<br>72 | 38.1577 | 204.236 | 2.42019 | 5.00E-05 | 0.0047  | yes |
| ENSMUS<br>G0000006<br>9324.5 | Gm5096  | chr18:87<br>756285-<br>8775814<br>3  | 115.049 | 615.954 | 2.42058 | 5.00E-05 | 0.0047  | yes |
| ENSMUS<br>G0000000<br>6218.4 | Fam131c | chr4:141<br>368219-<br>1413841<br>75 | 0.87537 | 4.74553 | 2.4386  | 5.00E-05 | 0.0047  | yes |
| ENSMUS<br>G0000005<br>7933.5 | Gsta2   | chr9:783<br>31017-<br>7835578<br>8   | 3.02156 | 16.5823 | 2.45628 | 5.00E-05 | 0.0047  | yes |
| ENSMUS<br>G0000006<br>1292.6 | Cyp3a59 | chr5:146<br>079257-<br>1461132<br>85 | 7.07867 | 39.6305 | 2.48506 | 5.00E-05 | 0.0047  | yes |
| ENSMUS<br>G0000003<br>0643.8 | Rab30   | chr7:927<br>41602-<br>9283711<br>7   | 1.10174 | 6.40984 | 2.5405  | 0.0004   | 0.02704 | yes |
| ENSMUS<br>G0000007<br>4768.5 | Bhmt    | chr13:93<br>616890-<br>9363796<br>1  | 123.467 | 722.312 | 2.5485  | 5.00E-05 | 0.0047  | yes |
| ENSMUS<br>G0000004<br>9493.8 | Pls1    | chr9:957<br>52641-<br>9584531<br>1   | 0.5191  | 3.14768 | 2.6002  | 0.0006   | 0.03678 | yes |
| ENSMUS<br>G0000006<br>6072.8 | Cyp4a10 | chr4:115<br>518263-<br>1155336<br>49 | 25.9562 | 162.605 | 2.64722 | 5.00E-05 | 0.0047  | yes |
| ENSMUS<br>G0000003<br>8776.8 | Ephx1   | chr1:180<br>976154-<br>1810209<br>04 | 61.0153 | 386.579 | 2.66352 | 5.00E-05 | 0.0047  | yes |
| ENSMUS<br>G0000002<br>1701.7 | Plk2    | chr13:11<br>0395043-<br>1104008      | 1.38019 | 8.89865 | 2.68872 | 5.00E-05 | 0.0047  | yes |

|                               |                   |                                      |         |         |         |          |         |     |
|-------------------------------|-------------------|--------------------------------------|---------|---------|---------|----------|---------|-----|
|                               |                   | 44                                   |         |         |         |          |         |     |
| ENSMUS<br>G0000001<br>9935.11 | Slc17a8           | chr10:89<br>574019-<br>8962125<br>3  | 0.85826 | 5.93384 | 2.78948 | 5.00E-05 | 0.0047  | yes |
| ENSMUS<br>G0000007<br>2949.5  | Acot1             | chr12:84<br>009501-<br>8401767<br>0  | 3.11668 | 21.6708 | 2.79767 | 5.00E-05 | 0.0047  | yes |
| ENSMUS<br>G0000000<br>8153.6  | Clstn3            | chr6:124<br>430758-<br>1244647<br>94 | 0.40684 | 2.85848 | 2.81272 | 0.00015  | 0.01175 | yes |
| ENSMUS<br>G0000003<br>8768.8  | 9130409I<br>23Rik | chr1:181<br>051236-<br>1810606<br>67 | 0.45883 | 4.21215 | 3.19854 | 5.00E-05 | 0.0047  | yes |
| ENSMUS<br>G0000003<br>0004.6  | Nat8              | chr6:858<br>30387-<br>8583208<br>2   | 0.65219 | 6.70661 | 3.36221 | 5.00E-05 | 0.0047  | yes |
| ENSMUS<br>G0000003<br>2080.6  | Apoa4             | chr9:462<br>40695-<br>4624352<br>9   | 37.9121 | 393.101 | 3.37417 | 5.00E-05 | 0.0047  | yes |
| ENSMUS<br>G0000002<br>4411.9  | Aqp4              | chr18:15<br>389393-<br>1540368<br>4  | 0.30136 | 3.30165 | 3.45363 | 5.00E-05 | 0.0047  | yes |
| ENSMUS<br>G0000002<br>9188.9  | Slc34a2           | chr5:530<br>38081-<br>5307166<br>4   | 0.12019 | 1.70108 | 3.82308 | 0.00085  | 0.04571 | yes |
| ENSMUS<br>G0000002<br>9272.7  | Sult1e1           | chr5:875<br>75967-<br>8759161<br>1   | 0.51403 | 7.89722 | 3.94141 | 0.00065  | 0.03884 | yes |
| ENSMUS<br>G0000003<br>8508.7  | Gdf15             | chr8:706<br>29392-<br>7063245<br>6   | 0.45748 | 7.28541 | 3.99322 | 5.00E-05 | 0.0047  | yes |
| ENSMUS<br>G0000004<br>1801.5  | Phlda3            | chr1:135<br>766118-<br>1357691<br>36 | 0.55524 | 9.89557 | 4.15559 | 5.00E-05 | 0.0047  | yes |
| ENSMUS<br>G0000007<br>5014.1  | Gm1080<br>0       | chr2:986<br>66546-<br>9866730<br>1   | 0.4364  | 35.7039 | 6.3543  | 0.00085  | 0.04571 | yes |
| ENSMUS                        | Cdkn1a            | chr17:29                             | 0.29636 | 31.956  | 6.75261 | 0.0001   | 0.00851 | yes |

|                              |             |                                     |   |         |     |          |        |     |
|------------------------------|-------------|-------------------------------------|---|---------|-----|----------|--------|-----|
| G0000002<br>3067.8           |             | 090978-<br>2910072<br>2             |   |         |     |          |        |     |
| ENSMUS<br>G0000002<br>4503.2 | Spink3      | chr18:43<br>728068-<br>4373723<br>7 | 0 | 2.83716 | 100 | 5.00E-05 | 0.0047 | yes |
| ENSMUS<br>G0000007<br>5015.3 | Gm1080<br>1 | chr2:986<br>62236-<br>9866408<br>3  | 0 | 6.24728 | 100 | 5.00E-05 | 0.0047 | yes |

**Supplementary Table S3** - Primer sequences used in the qRT-PCR

| S No.        | Primer         | Sequence                                                                                                                                          |
|--------------|----------------|---------------------------------------------------------------------------------------------------------------------------------------------------|
| <b>Human</b> |                |                                                                                                                                                   |
| 1.           | H19            | FP: 5'-ACTCAGGAATCGGCTCTGGAA-3'<br>RP: 5'-CTGCTGTTCCGATGGTGTCTT-3'                                                                                |
| 2.           | PCK1           | FP: 5'-GGTCCCAGGGTGCATGAAA-3'<br>RP: 5'-CACGTAGGGTGAATCCGTCAG-3'                                                                                  |
| 3.           | G6PC           | FP: 5'-TCTACGTCCTCTTCCCCATC-3'<br>RP: 5'-TCAGTATCCAAAACCCACCAG-3'                                                                                 |
| 4.           | FBP            | FP: 5'-TTTCTGTACCCCGCTAACAAAG-3'<br>RP: 5'-TGAATGTCTGTGGGAATGACG-3'                                                                               |
| 5.           | PC             | FP: 5'-GACTCTGTGAAACTCGCTAAAC-3'<br>RP: 5'-CTCTGTGACCGTGTGCTC-3'                                                                                  |
| 6.           | 18S rRNA       | FP: 5'-AGAAACGGCTACCACATCCA-3'<br>RP: 5'-CCCTCCAATGGATCCTCGTT-3'                                                                                  |
| <b>Mouse</b> |                |                                                                                                                                                   |
| 1.           | H19            | FP: 5'-CCTCAAGATGAAAGAAATGGTGCTA-3'<br>RP: 5'-TCAGAACGAGACGGACTTAAAGAA-3'                                                                         |
| 2.           | Igf2           | FP: 5'-GCTTGTTGACACGCTTCAGTTTG-3'<br>RP: 5'-GTTGGCACGGCTTGAAGGC-3'                                                                                |
| 3.           | miR-675        | RT primer: 5'-CTCAACTGGTGTCGTGGAGTCGGC<br>AATTCAGTTGAGACTGTGGG-3'<br>FP: 5'-ACACTCCAGCTGGGTGGTGC GGAAAGGGCC-3'<br>RP: 5'-GTGTCGTGGAGTCGGCAATTC-3' |
| 4.           | $\beta$ -actin | FP: 5'-AGTGTGACGTTGACATCCGTA-3'<br>RP: 5'-GCCAGAGCAGTAATCTCCTTCT-3'                                                                               |
| 5.           | U6             | FP: 5'-GCTTCGGCAGCACATATACTA-3'<br>RP: 5'-AAATATGGAACGCTTCACGA-3'                                                                                 |

|                                        |      |                                                                        |
|----------------------------------------|------|------------------------------------------------------------------------|
| 6.                                     | Pck1 | FP: 5' -CCATCCCAACTCGAGATTCTG-3'<br>RP: 5' -CTGAGGGCTTCATAGACAAGG-3'   |
| 7.                                     | Fbp1 | FP: 5' -CTGATATTCACCGCACTCTGG-3'<br>RP: 5' -CGGCCTTCTCCATGACATAAG-3'   |
| 8.                                     | Pcx  | FP: 5' -GGACTCCTTTGGACACAGAG-3'<br>RP: 5' -AATCTCATTCTCATAACACGTCGG-3' |
| FP, Forward Primer; RP, Reverse Primer |      |                                                                        |

### Supplementary Figure S1

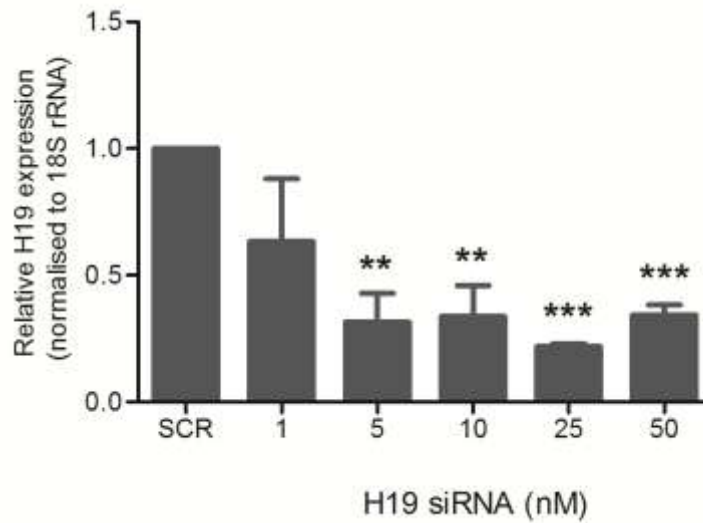

**Supplementary Figure S1** - HepG2 cells were reverse transfected with the H19 siRNA (1-50nM) and control cells were transfected with the scramble (SCR), and after 48h of incubation RNA was isolated and assessed for the transcript levels of H19 by qRT-PCR. 18S rRNA was used as a normalization control. Data is presented as mean  $\pm$  SEM of at least three independent experiments. \*\*P < 0.01, \*\*\*P < 0.001 as compared to scramble transfected cells (SCR).

Supplementary Figure S2 – Full-length blots used to generate Fig. 5c

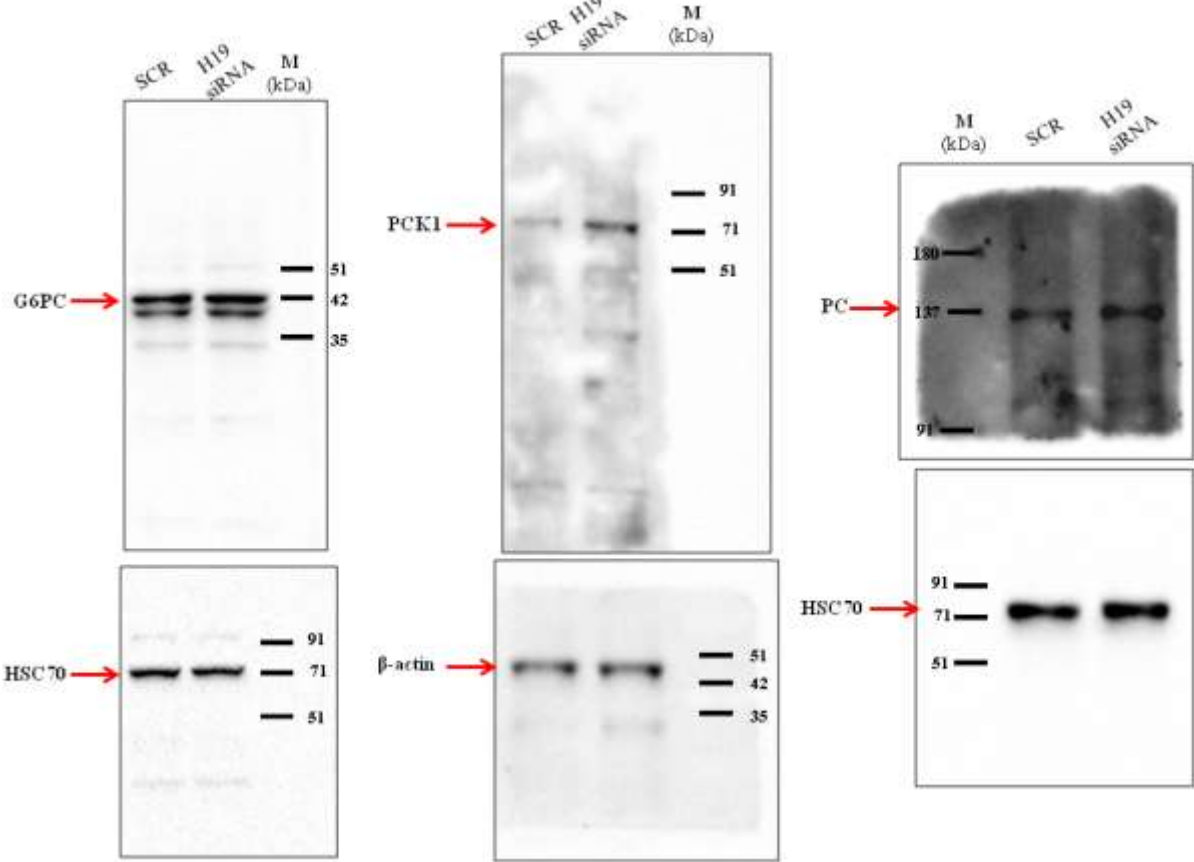



Supplementary Figure S3 – Full-length blots used to generate Fig. 6a

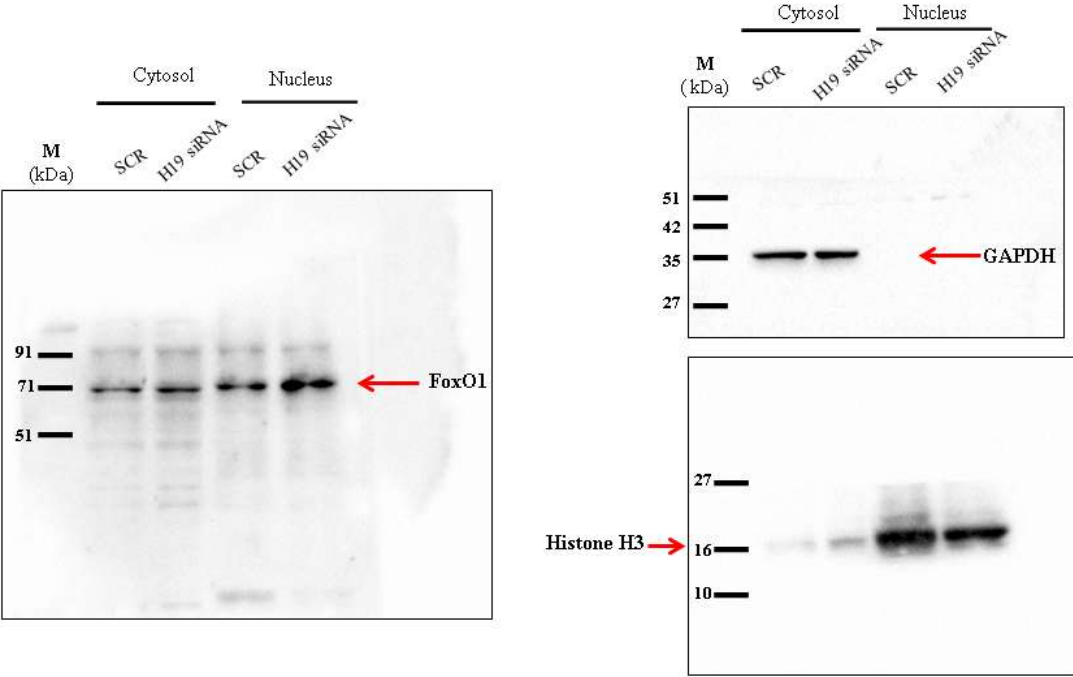

Supplementary Figure S4 – Full-length blots used to generate Fig. 6c

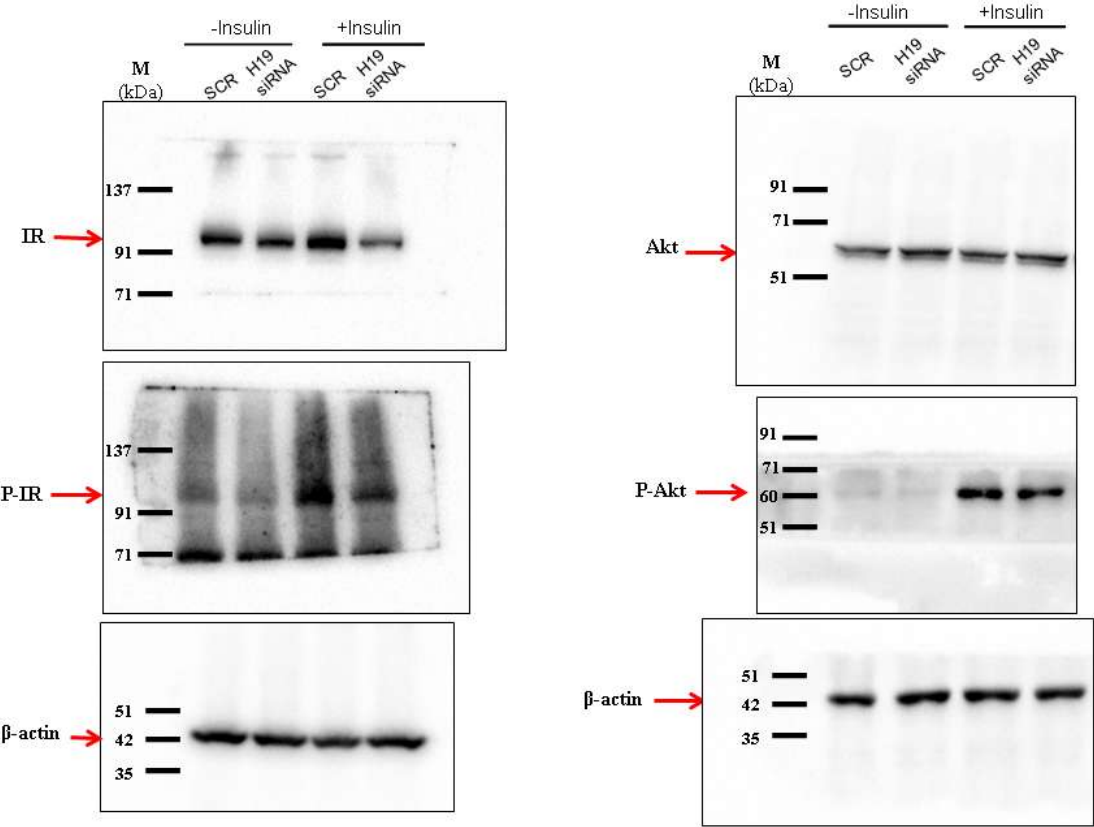

Supplement: 41598_2017_8281_MOESM1_ESM.pdf [file 41598_2017_8281_MOESM1_ESM.pdf]
